# Supplementary material for: Construction and Analysis of the lncRNA-miRNA-mRNA Network Based on Competing Endogenous RNA in Atrial Fibrillation
Source: PubMed Central journal article supplement (PMC8818759; doi:10.3389/fcvm.2022.791156), 2022-01-24
Supplement: Data_Sheet_1.pdf [file Data_Sheet_1.pdf]

## Supplementary Figures

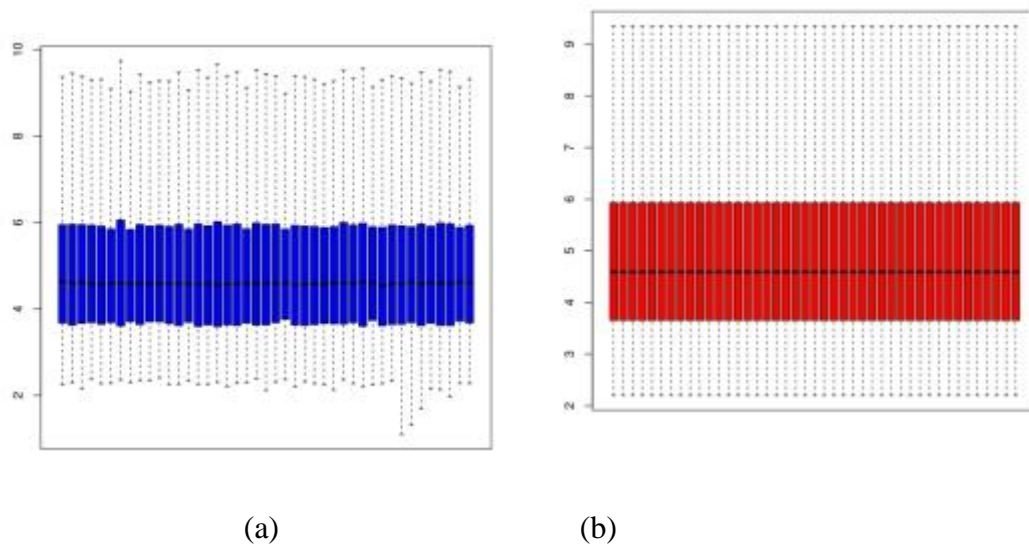

**Supplementary Figure 1** (a) Data standardization. Pre-standardization gene expression levels of each data set are presented as blue boxplots; (b) Data standardization. Post-standardization gene expression levels of each data set are presented as red boxplots.

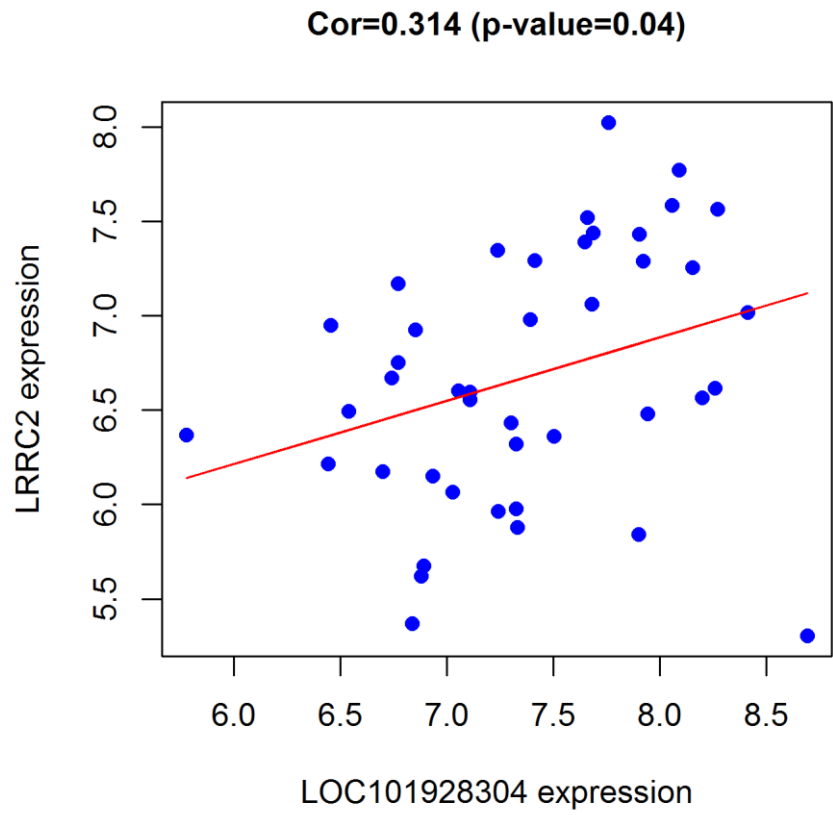

**Supplementary Figure 2** LOC101928304 was positively correlated with LRRC2.
